# Supplementary material for: The Streptococcus pyogenes hyaluronic acid capsule promotes experimental nasal and skin infection by preventing neutrophil-mediated clearance
Source: PubMed Central journal article supplement (PMC9744330; doi:10.1371/journal.ppat.1011013), 2022-11-30
Supplement: ppat.1011013.s001.pdf [file ppat.1011013.s001.pdf]

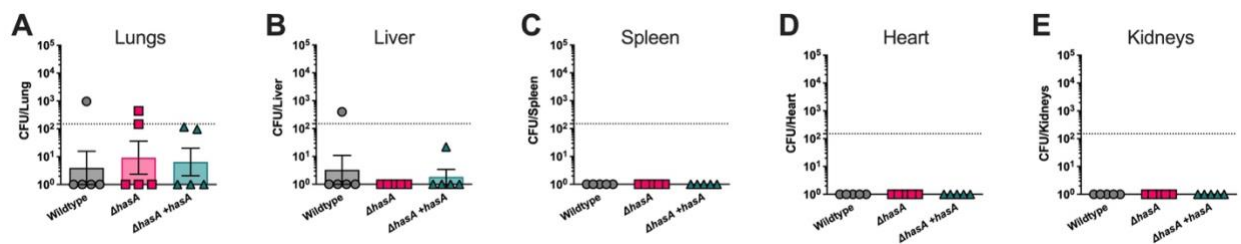

**Fig S1. Deletion of the *hasA* gene in *S. pyogenes* MGAS8232 does not enhance bacterial dissemination in B6<sup>HLA</sup> mice.** B6<sup>HLA</sup> mice were nasally challenged with  $\sim 1 \times 10^8$  CFUs of wildtype *S. pyogenes* or  $\Delta hasA$ . Mice were sacrificed 48 h later, and indicated organs were harvested, homogenized, and plated on TSA with 5% sheep blood agar to assess bacterial dissemination. Bacterial CFUs were measured in the (A) lungs, (B) liver, (C) spleen, (D) heart, and (E) kidneys. Data points represent CFUs of indicated organs from individual mice ( $n \geq 4$  per group). Bars represent geometric mean  $\pm$  SEM. Horizontal dotted line indicates theoretical limit of detection. Significance was determined by one-way ANOVA with Dunnett's multiple comparisons test, data not significant.
