# Supplementary material for: The Streptococcus pyogenes hyaluronic acid capsule promotes experimental nasal and skin infection by preventing neutrophil-mediated clearance
Source: PubMed Central journal article supplement (PMC9744330; doi:10.1371/journal.ppat.1011013), 2022-11-30
Supplement: ppat.1011013.s002.pdf [file ppat.1011013.s002.pdf]

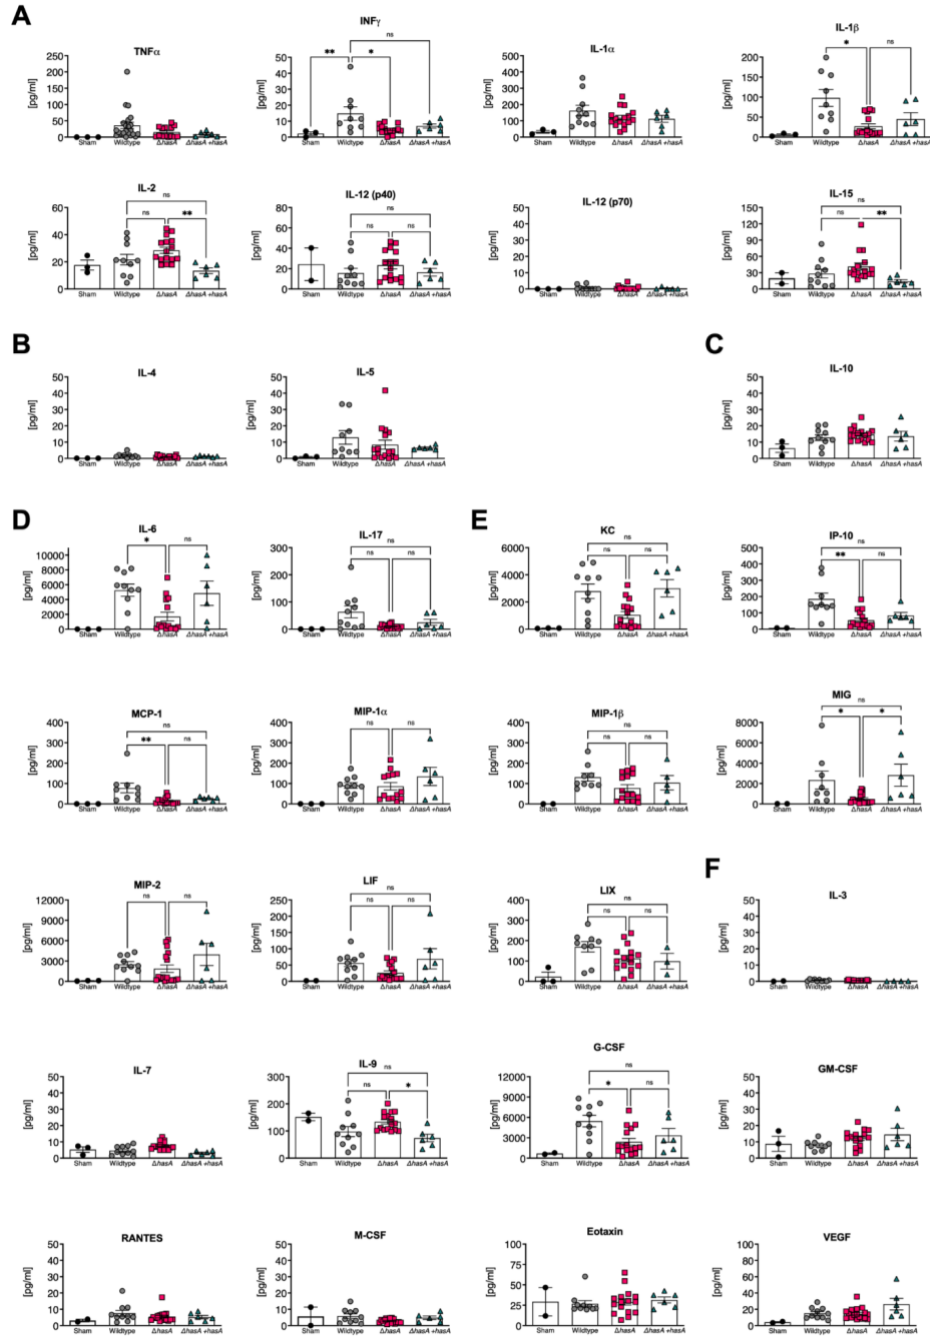

**Fig S2. Cytokine response in nasal turbinates of B6<sup>HLA</sup> mice during streptococcal infection.** Mice were inoculated with HBSS as sham control (black circles) or infected intranasally with  $\sim 1 \times 10^8$  CFUs of wildtype *S. pyogenes* MGAS8232 wildtype,  $\Delta hasA$ , or  $\Delta hasA + hasA$  strains. Mice were sacrificed 48 h post-infection and cNT homogenates were analyzed for multiple cytokines and chemokines (Th1-type [A]; Th2-type cytokines [B]; Treg cytokines [C]; Th17 cytokines [D]; chemokines [E]; or growth factors [F]). Data represents the mean  $\pm$  SEM of cNT cytokine/chemokine concentrations ( $\text{pg mL}^{-1}$ ) ( $n \geq 3$  mice per group). Significance was determined by one-way ANOVA with Dunnett's multiple comparison test (\*  $P < 0.05$ ; \*\*  $P < 0.01$ ; \*\*\*  $P < 0.001$ ).
