# Supplementary material for: The Streptococcus pyogenes hyaluronic acid capsule promotes experimental nasal and skin infection by preventing neutrophil-mediated clearance
Source: PubMed Central journal article supplement (PMC9744330; doi:10.1371/journal.ppat.1011013), 2022-11-30
Supplement: ppat.1011013.s003.pdf [file ppat.1011013.s003.pdf]

**Table S1. Primers in this study.**

| <b>Plasmid</b>                              | <b>Primer Sequence (5'→ 3')</b>                         |
|---------------------------------------------|---------------------------------------------------------|
| Primers for <i>hasA</i> deletion constructs |                                                         |
| <i>hasA</i> up <i>Bam</i> HI For            | CCC <u>GGATCC</u> TGTTTCCTTAATAAATAGTGTGAT              |
| <i>hasA</i> up <i>Pst</i> I Rev             | CCC <u>CTGCAG</u> TAAAGTTTTTTTTAAAAATAGGCACAATTACACC    |
| <i>hasA</i> down <i>Pst</i> I For           | CCC <u>CTGCAG</u> AAAAAGGTCACTATTTTTAAATAATATATGCATCGAG |
| <i>hasA</i> down <i>Kpn</i> I Rev           | CCC <u>GGTACC</u> TTCACAAGAAACAATAATTCGGCTTGG           |
| Primers for sequencing and screening        |                                                         |
| M13 For                                     | GTAAAACGACGGCCAG                                        |
| M13 Rev                                     | GTCATAGCTGTTTCCTG                                       |
| <i>hasA</i> Screen For                      | CTCTAAACTGCCTAACAGTTGGATAAACACTC                        |
| <i>hasA</i> Screen Rev                      | GTGCAAATTTTTCTGCGTCTGCC                                 |
| Primers for generating complements          |                                                         |
| <i>hasA</i> Comp <i>Xho</i> I For           | CCC <u>CTCGAG</u> GGGTGAAGTTTTTTAATGGAAGCAC             |
| <i>hasA</i> Comp <i>Spe</i> I Rev           | CCC <u>ACTAGTG</u> AGGGAAGAATATCAACAATAGTGACTIONCG      |

<sup>1</sup>Restriction sites (indicated in the primer name) are underlined in the primer sequence
