# Supplementary material for: The Streptococcus pyogenes hyaluronic acid capsule promotes experimental nasal and skin infection by preventing neutrophil-mediated clearance
Source: PubMed Central journal article supplement (PMC9744330; doi:10.1371/journal.ppat.1011013), 2022-11-30
Supplement: ppat.1011013.s004.pdf [file ppat.1011013.s004.pdf]

**Table S2. SNPs identified through genome wide comparisons of wildtype *S. pyogenes* MGAS8232 and  $\Delta hasA$  strains**

| Gene              | Locus       | Protein    | Gene length (bp) | Codon number | Reference nucleotide | Competing nucleotide | Nucleotide in codon | Amino acid change |
|-------------------|-------------|------------|------------------|--------------|----------------------|----------------------|---------------------|-------------------|
| pstI <sup>a</sup> | spyM18_1384 | AAL97979.1 | 1734             | 194          | A                    | T                    | 1                   | L > F             |
| pstI <sup>a</sup> | spyM18_1384 | AAL97979.1 | 1734             | 306          | C                    | T                    | 2                   | S > F             |

<sup>a</sup> cytosolic enzyme I in the phosphoenolpyruvate-protein phosphotransferase system
